# Supplementary material for: Development and validation of a nomogram to predict the mortality risk in elderly patients with ARF
Source: PeerJ journal article supplement (doi:10.7717/peerj.11016), 2021-03-09

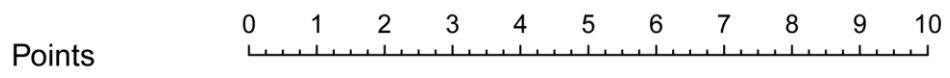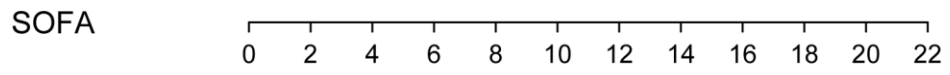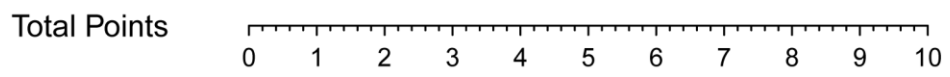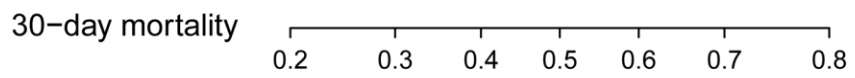

Supplement: SOFA_nomogram.pdf [file SOFA_nomogram.pdf]
